# Supplementary material
Source: PubMed Central journal article supplement (PMC6752721)

## Supporting Information

**Materials and General Methods.** Reagents for peptide synthesis and Rink amide resin (100-200 mesh, 0.54 mmol/g) were purchased from Chem-Impex (Wood Dale, IL). Unless noted otherwise, the purity of peptides was assessed by reversed-phase analytical HPLC equipped with a C18 column and the identity was confirmed by MALDI-TOF mass spectrometric analyses on a Bruker UltrafleXtreme MALDI-TOF-TOF instrument (Campus Chemical Instrument Center, The Ohio State University). The purity and MS data are presented in Table S1 and Figure S3.

**Synthesis of Cyclic Peptides 1, 6, CPP1, CPP9, and CPP12.** Peptides were manually synthesized on 100 mg of Rink amide resin (0.54 mmol/g) by standard Fmoc chemistry. For each cycle, the resin was swollen in DMF for 20 min and Fmoc group was then removed by treatment with 20% piperidine in DMF for 5 min (twice). The resin was washed with DMF/DCM/DMF (3 times) and the next amino acid was coupled in standard Fmoc/HATU chemistry by using Fmoc-amino acid/HATU/DIPAE (4, 4, and 8 equiv) in DMF (2 h at RT). The coupling reactions were monitored by ninhydrin test after each residue. After completion of the linear sequence, the allyl group on the  $\alpha$ -carboxyl group of the C-terminal L-Glu was removed by treatment with tetrakis(triphenylphosphine)palladium/phenylsilane (0.3 and 10 equiv, respectively) in DCM for 15 min (3 times). The resin was washed twice with sodium dimethyldithiocarbamate dihydrate (SDDNa, 0.5 M in DMF) and the N-terminal Fmoc group was removed by treatment with 20% piperidine. The resin was washed with DMF, DCM, and DMF (3 times each) and incubated with 1 M HOBt for 5 min. The peptide was cyclized on the resin by treatment with PyBOP/HOBt/DIPEA (5, 5, and 10 equiv, respectively) for 2 h (twice). The resin was then washed with DMF and DCM (3 times each). The cyclic peptide was released from the resin and deprotected by treating the resin with 92.5% TFA, 2.5% triisopropylsilane (TIPS), 2.5% H<sub>2</sub>O and 2.5% dimethoxybenzene (DMB) for 3 h. After evaporation of the solvents, the crude peptides were triturated with cold diethylether 3 times and purified by reversed-phase HPLC on a semi-preparative C18 column. For labeling with naphthofluorescein, the purified peptide (~1 mg) was dissolved in 25  $\mu$ L of DMF and the pH was adjusted to ~8 with the addition of 1 M NaHCO<sub>3</sub>, and 1 mg of naphthofluorescein O-succinimidyl ester (NF-OSu) in 25  $\mu$ L of DMF was added. The mixture was incubated for 2 h at RT. The labeled peptide was purified again by reversed-phase HPLC on a C18 column.

**Synthesis of Peptides 2-5, 8, 9-16.** Synthesis was carried out as described above, but with the following modifications. After the coupling of Fmoc-L-Dap(Mtt)-OH [or Fmoc-L-Lys(Mtt)-OH, Fmoc-L-Orn(Mtt)-OH], the Mtt group was removed by treatment with 2% TFA and 2% triisopropylsilane in DCM (6 x 5 min). The exposed side-chain amino group was amidated by treatment with decanoic acid/HATU/DIPEA (4, 4, 8 equiv) in DMF (2 h at RT). The resin was washed with DCM and DMF (3 times each).

**Synthesis of Peptide 7.** Synthesis was carried out as described above, but with the following modifications. After the coupling of Fmoc-L-Dap(Mtt)-OH, the resin was washed with DCM and DMF (3 times each). The allyl group on the  $\alpha$ -carboxyl group of the C-terminal L-Glu was removed by treatment with tetrakis(triphenylphosphine)palladium/phenylsilane (0.3 and 10 equiv, respectively) in DCM for 15 min (3 times). The resin was washed twice with sodium dimethyldithiocarbamate dihydrate (SDDNa, 0.5 M in DMF) and the N-terminal Fmoc group was

removed by treatment with 20% piperidine. The resin was washed with DMF, DCM, and DMF (3 times each) and incubated with 1 M HOBt for 5 min. The peptide was cyclized on the resin by treatment with PyBOP/HOBt/DIPEA (5, 5, and 10 equiv, respectively) for 2 h (twice). The resin was washed with DMF and DCM (3 times each). The Mtt group (on Dap) was removed by treatment with 2% TFA and 2% triisopropylsilane in DCM (6 x 5 min). The exposed side-chain amino group was then reacted with Fmoc-OSu (4 equiv) in DMF (2 h at RT).

**Synthesis of Peptide 17.** Synthesis was carried out as described above, but with the following modifications. After coupling of Fmoc-L-Asp(2-PhiPr)-OH (where 2-PhiPr is 2-phenylisopropyl), the 2-PhiPr group was removed by treatment with 2% TFA and 2% triisopropylsilane in DCM (6 x 5 min). The exposed side-chain carboxyl group was then amidated by treatment with decylamine/PyBOP/HOBt/DIPEA (1, 5, 5, and 10 equiv) twice in DMF solution. The resin was washed with DCM and DMF (3 times each).

**Synthesis of FITC-Labeled Peptide 17.** The HPLC purified peptide (~1 mg) was dissolved in 25  $\mu$ L of DMF and the pH was adjusted to ~8 with the addition of 1 M NaHCO<sub>3</sub>, and 1 mg of FITC in 25  $\mu$ L of DMF was added. The mixture was incubated for 2 h at RT. The labeled peptide was purified again by reversed-phase HPLC on a C18 column.

**Flow Cytometry.** HeLa cells were seeded in 12-well plates at a density  $1.5 \times 10^5$  cells per well overnight. Next day, 5  $\mu$ M NF-labeled peptide was added in DMEM media supplemented with 1% or 10% FBS and 1% penicillin/streptomycin sulfate for 2 h. After 2 h, the media was removed, and the cells were washed with cold DPBS and harvested by incubating with 0.25% trypsin for 5 min. The detached cells were washed with DPBS, suspended in DPBS, and analyzed by flow cytometry (BD FACS Aria III), with excitation at 633 nm.

**Confocal Microscopy.** One mL of HeLa cell suspension ( $\sim 5 \times 10^4$  cells) was seeded in a 35-mm glass-bottomed microwell dish (MatTek) and cultured overnight. For end-stage imaging, cells were gently washed with DPBS twice and treated for 2 h with FITC-labelled peptides (5  $\mu$ M) in phenol-red free, HEPES supplemented DMEM containing 1% FBS. After removal of the medium, the cells were gently washed with DPBS twice and imaged on a Nikon A1R live-cell confocal equipped with 100X oil objective or a Visitech Infinity 3 Hawk 2D-array live cell confocal microscope equipped with 60X oil objective. Data were analyzed using NIS-Elements AR or MetaMorph Premier.

**MTT Cell Viability Assay.** HeLa cells were seeded in a 96-well plate at a density of 5000 cells/well (100  $\mu$ L in each well) in DMEM supplemented with 10% FBS and 1% penicillin/streptomycin sulfate overnight. Next day, peptide was added to the cells and incubated in 5% CO<sub>2</sub> incubator at 37 °C for 72 h. Ten  $\mu$ L of 3-(4,5-dimethylthiazol-2-yl)-2,5-diphenyltetrazolium bromide (MTT) solution (5 mg/mL) was added to each well and incubated for 2 h. One hundred  $\mu$ L of the SDS-HCl solubilizing buffer was added to each well and the contents were carefully mixed by pipetting up and down. The plate was incubated for 4 h and the absorbance of the solubilized formazan was measured on a Molecular Devices Spectramax M5 plate reader at 570 nm.

**Table S1.** Sequences and Cytosolic Entry Efficiencies of Cyclic CPPs

| Peptide | Sequence <sup>a</sup>                   | Molecular Mass (M + H <sup>+</sup> ) |          | Cellular Entry Efficiency <sup>b</sup> |             |
|---------|-----------------------------------------|--------------------------------------|----------|----------------------------------------|-------------|
|         |                                         | Calcd                                | Obsd     | In 10% FBS                             | In 1% FBS   |
| CPP12   | cyclo(FfΦRrRrQ)                         | 1975.932                             | 1975.839 | 100                                    | 100         |
| 1-NF    | cyclo(Dap <sup>Deca</sup> RRRRQ)        | 1687.842                             | 1687.868 | 6.72 ± 0.40                            |             |
| 2-NF    | cyclo(Dap <sup>Hexan</sup> RRRRQ)       | 1668.832                             | 1668.816 | 2.86 ± 0.22                            |             |
| 3-NF    | cyclo(Dap <sup>Octan</sup> RRRRQ)       | 1696.863                             | 1696.889 | 5.67 ± 0.63                            |             |
| 4-NF    | cyclo(Dap <sup>Deca</sup> RRRRQ)        | 1746.895<br>(M + Na <sup>+</sup> )   | 1746.906 | 57.5 ± 18.8                            | 44.1 ± 22.2 |
| 5-NF    | cyclo(Dap <sup>1-Pyren</sup> RRRRQ)     | 1798.816                             | 1798.836 | 10.5 ± 1.5                             |             |
| 6-NF    | cyclo(Dap <sup>3,3-dipheny</sup> RRRRQ) | 1707.811                             | 1707.834 | 3.89 ± 0.37                            |             |
| 7-NF    | cyclo(Dap <sup>Fmoc</sup> RRRRQ)        | 1792.827                             | 1792.861 | 17.0 ± 0.2                             |             |
| 8-NF    | cyclo(Dap <sup>1-Pyreneb</sup> RRRRQ)   | 1840.863                             | 1840.907 | 23.7 ± 0.9                             |             |
| 9-NF    | cyclo(Dap <sup>Deca</sup> RrRrQ)        | 1724.895                             | 1724.923 | 20.7 ± 9.0                             |             |
| 10-NF   | cyclo(Dap <sup>Deca</sup> rRrRQ)        | 1724.895                             | 1724.895 | 19.5 ± 5.8                             |             |
| 11-NF   | cyclo(Dap <sup>Deca</sup> RRRAQ)        | 1639.831                             | 1639.824 | 25.9 ± 3.9                             |             |
| 12-NF   | cyclo(Dap <sup>Deca</sup> ARRRQ)        | 1639.831                             | 1639.834 | 32.4 ± 1.9                             |             |
| 13-NF   | cyclo(Dap <sup>Deca</sup> RRRQ)         | 1568.794                             | 1568.692 | 3.03 ± 0.10                            |             |
| 14-NF   | cyclo(Dap <sup>Deca</sup> RRRRRQ)       | 1880.996                             | 1880.979 | 11.6 ± 0.9                             |             |
| 15-NF   | cyclo(Orn <sup>Deca</sup> RRRRQ)        | 1752.926                             | 1752.832 | 115 ± 32                               | 58.3 ± 22.0 |
| 16-NF   | cyclo(Lys <sup>Deca</sup> RRRRQ)        | 1766.942                             | 1767.638 | 76.3 ± 21.0                            | 43.5 ± 10.9 |
| 17-NF   | cyclo(Asp <sup>Decy</sup> RRRRQ)        | 1738.910                             | 1738.830 | 281 ± 59                               | 94.3 ± 41.3 |
| 17-FITC | cyclo(Asp <sup>Decy</sup> RRRRQ)        | 1668.867                             | 1668.644 |                                        |             |

<sup>a</sup>Single-letter codes for amino acids. Φ, 2-naphthylalanine.

<sup>b</sup>All values are relative to that of CPP12 (100%).

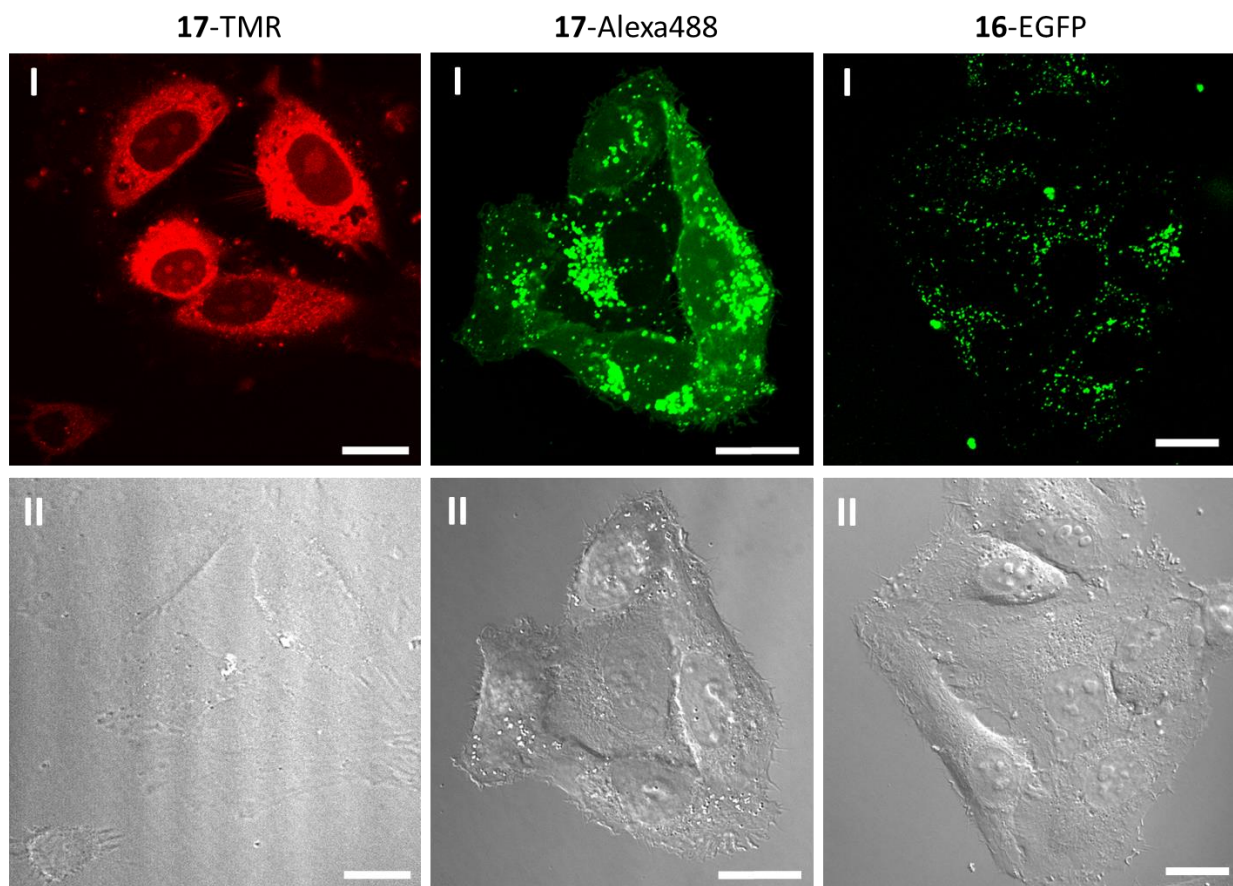

**Figure S1.** Live-cell confocal microscopic images of HeLa cells after 2-h treatment with 5  $\mu\text{M}$  TMR-labeled peptide **17** (**17-TMR**), Alexa488-labeled peptide **17** (**17-Alexa488**), or a peptide **16**-enhanced green fluorescent protein conjugate (**16-EGFP**) in the presence of 1% FBS. **16-EGFP** was prepared by attaching peptide **16** to the N-terminus of EGFP through a ybbR tag (*Biochemistry* **2014**, *53*, 4034-4046). I, fluorescence channel; II, DIC. Bars, 20  $\mu\text{m}$ .

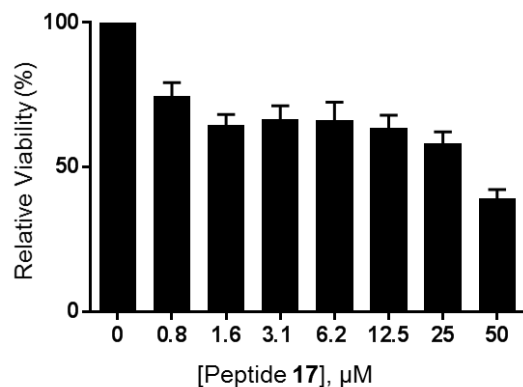

**Figure S2.** Effect of peptides **17** on the viability of HeLa cells as monitored by the MTT assay. Cells were incubated with the peptide for 72 h in the presence of 10% FBS ( $n = 6$ ). The origin for the slight reduction of HeLa cell viability at  $\leq 25$   $\mu\text{M}$  peptide **17** is yet unclear.

**Figure S3.** Reversed-phase HPLC chromatograms and HR MALDI-TOF MS of peptides used in this work. Doublet peaks for some peptides are due to the fact that commercial NF is a mixture of 5- and 6-carboxyl isomers. In some cases, epimerization at Gln residue during peptide cyclization may also contribute to multiple peaks.

Peptide 1-NF

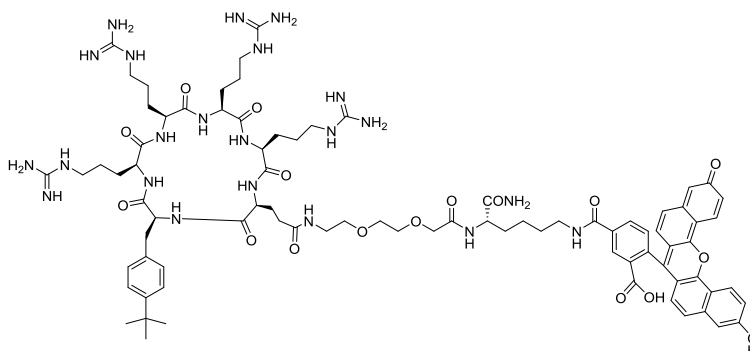

Crude peptide on semipreparative HPLC:

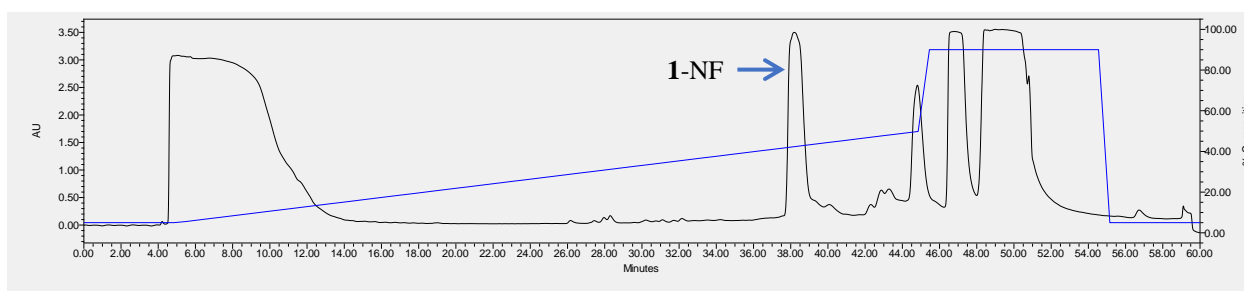

Purity check (analytical reversed-phase HPLC):

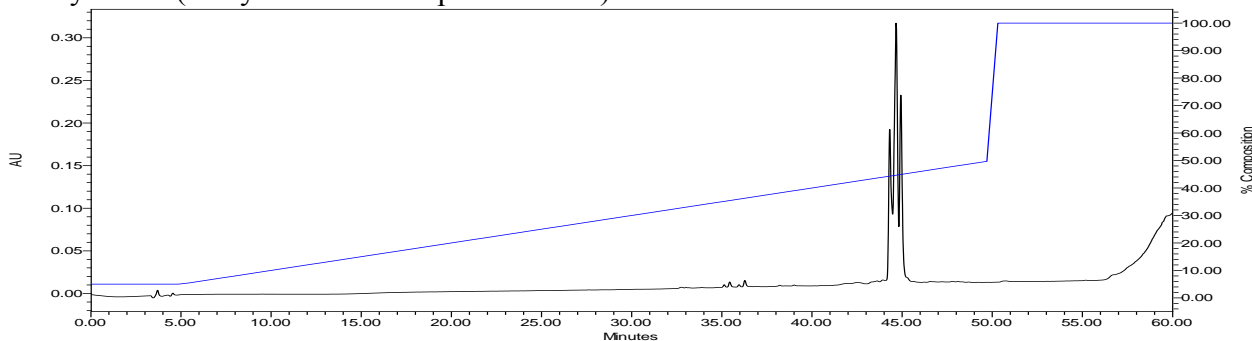

MALDI-TOF MS Expected for  $M+H^+$ : 1687.842; Found 1687.868

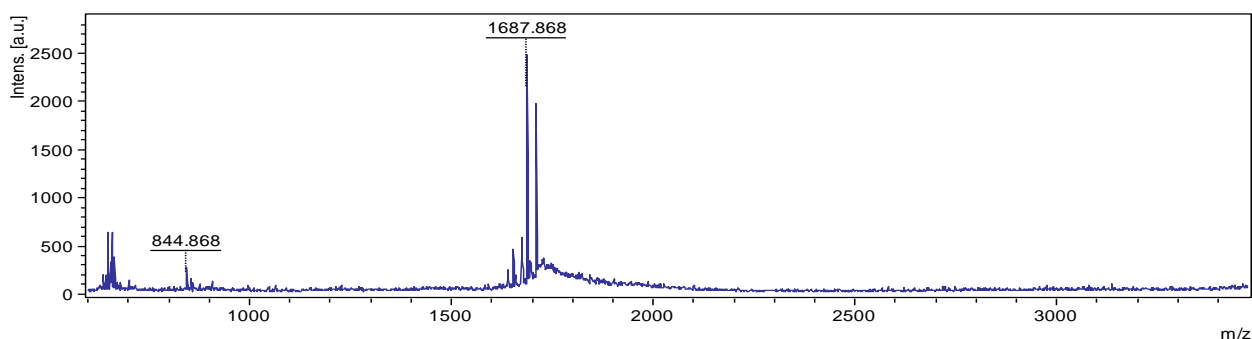





## Peptide 4-NF

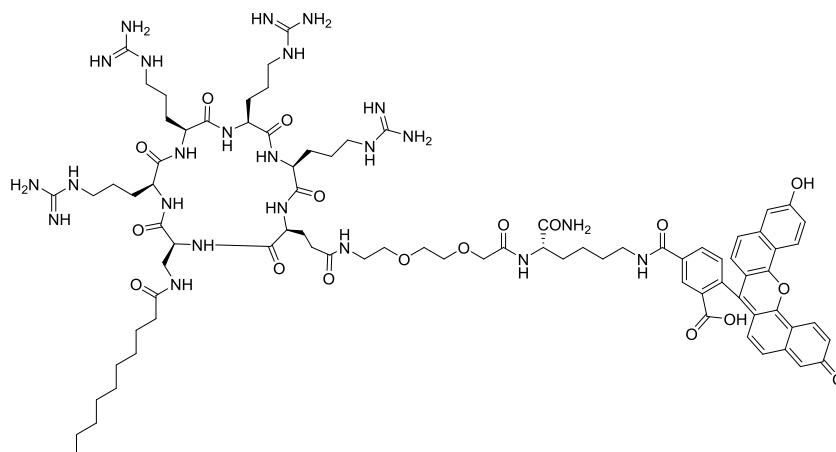

Crude peptide on semipreparative HPLC:

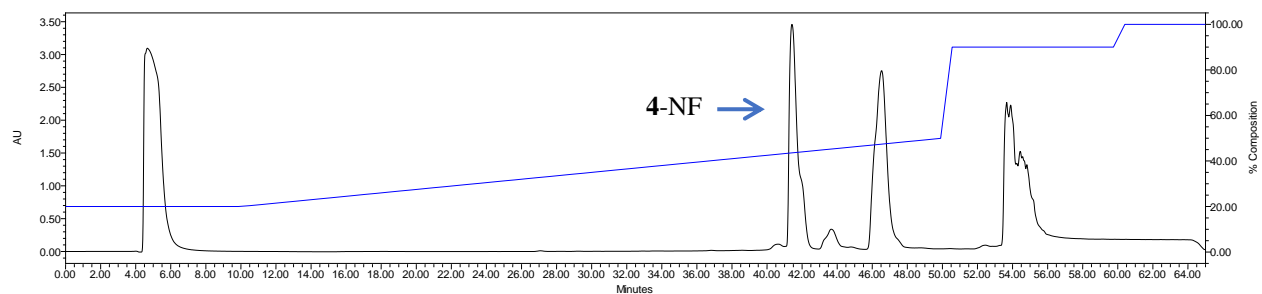

Purity check (analytical reversed-phase HPLC):

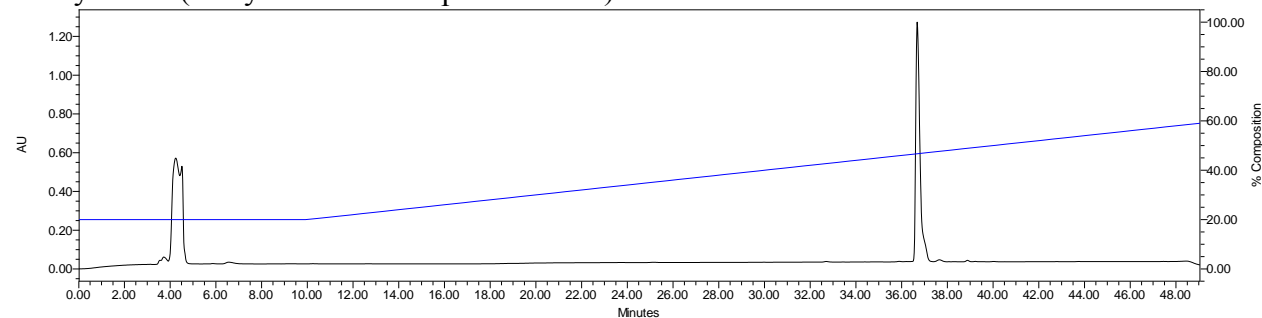

MALDI-TOF MS: Expected for  $M+Na^+$ : 1746.895; Found 1746.906

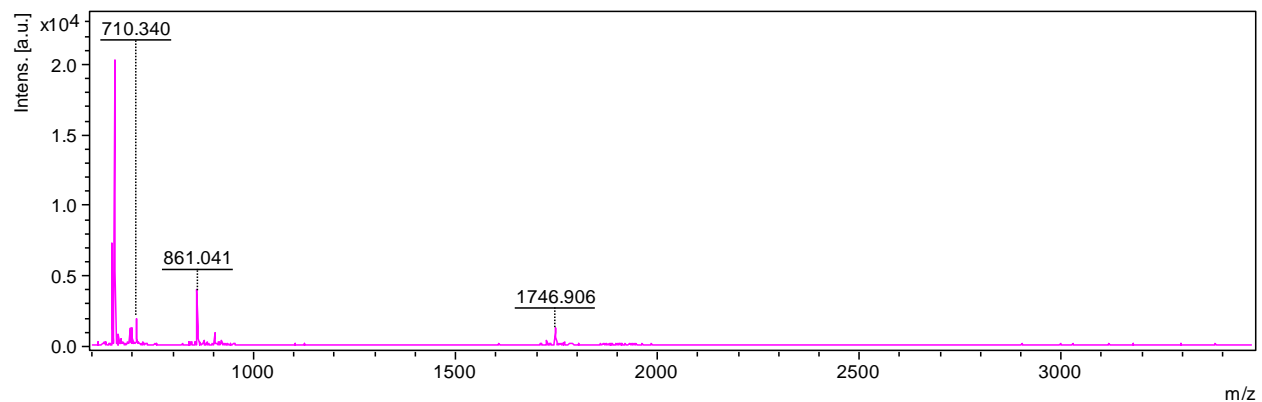



## Peptide 5-NF

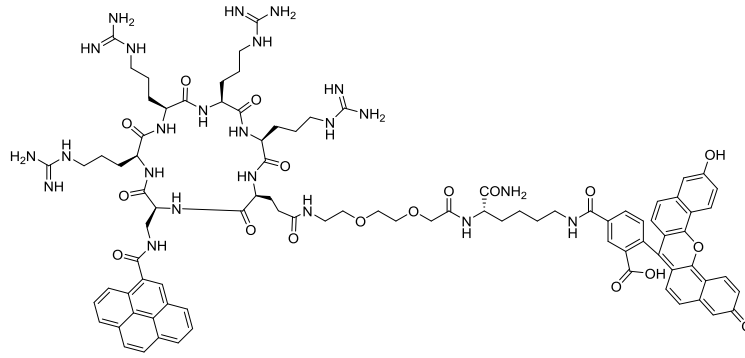

Crude peptide on semipreparative HPLC:

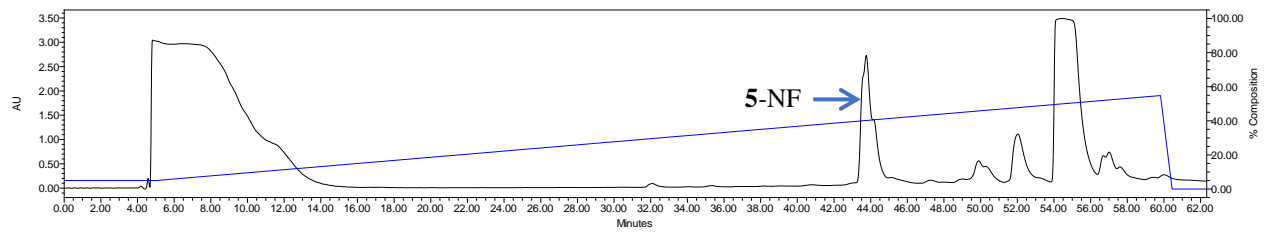

Purity check (analytical reversed-phase HPLC):

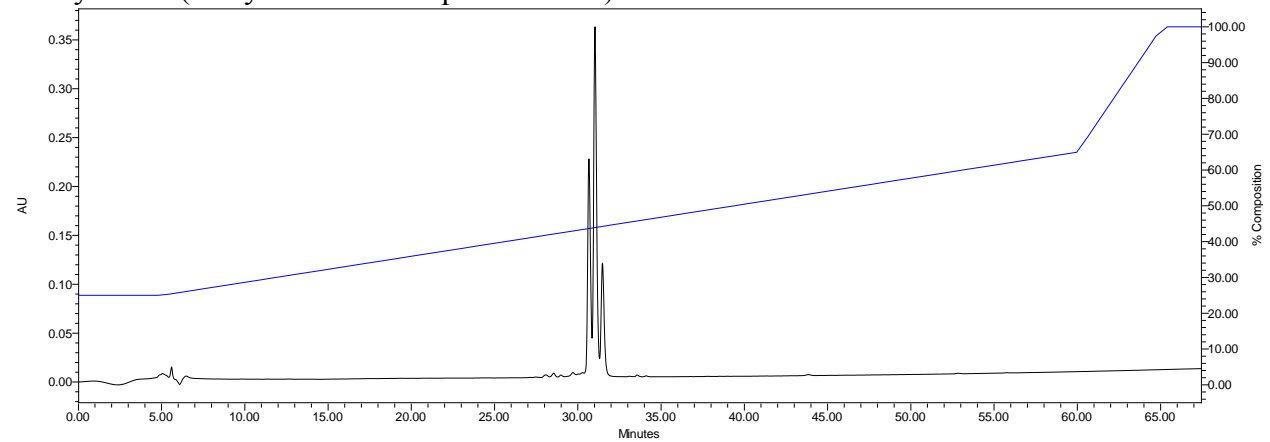

MALDI-TOF MS: Expected for  $M+H^+$ : 1798.816; Found 1798.836

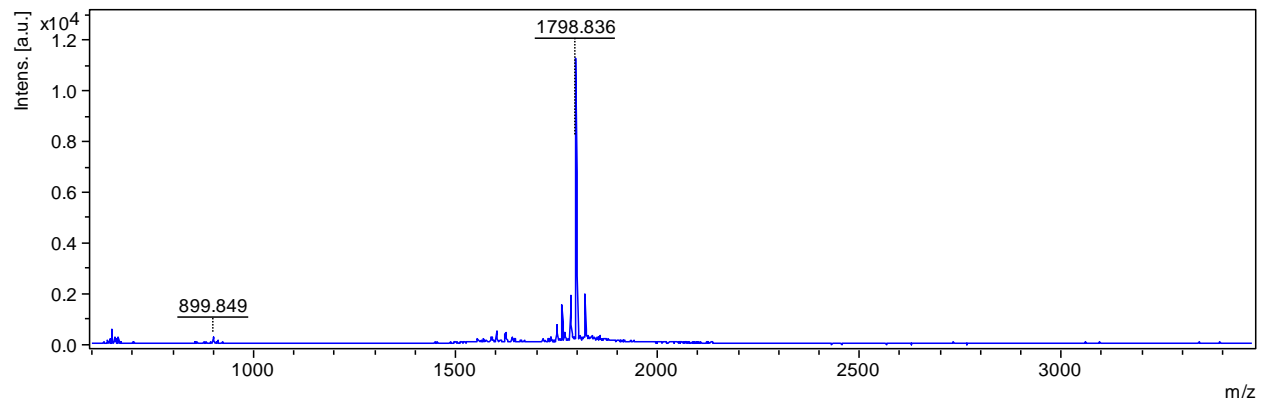

## Peptide 6-NF

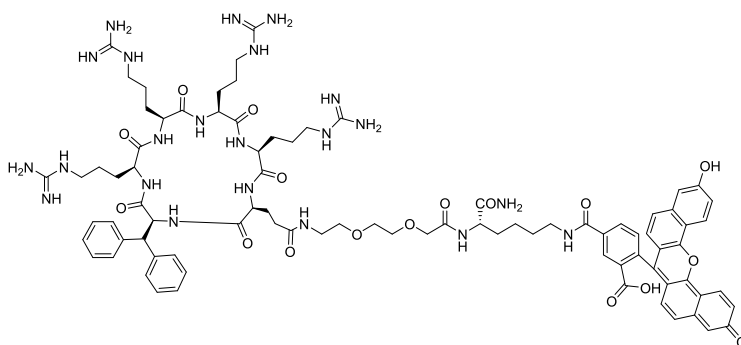

Crude peptide on semipreparative HPLC:

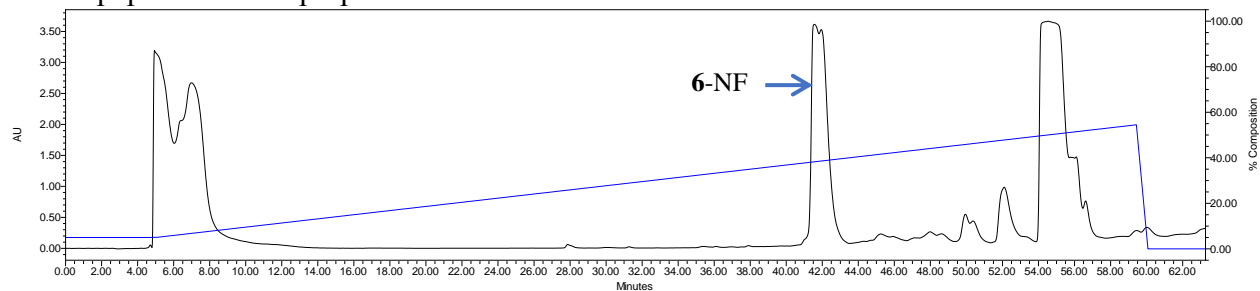

Purity check (analytical reversed-phase HPLC):

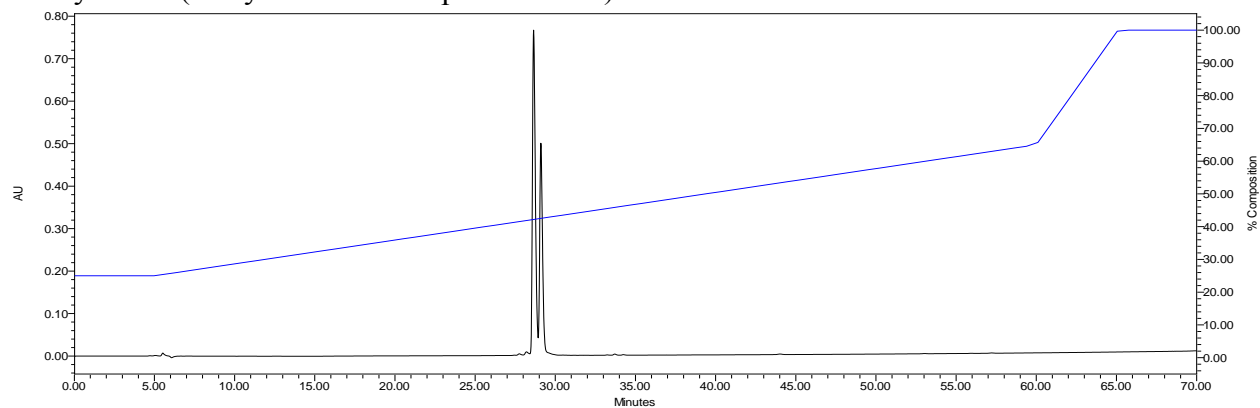

MALDI-TOF MS: Expected for  $M+H^+$ : 1707.811; Found 1707.834

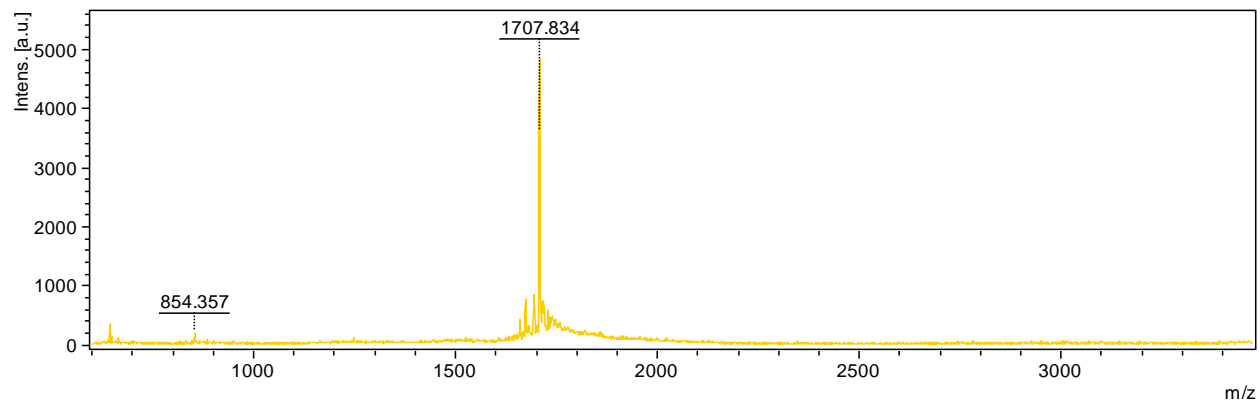



## Peptide 8-NF

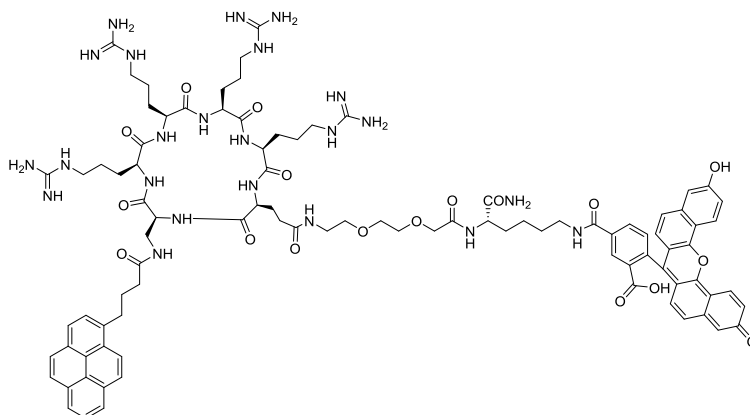

### Crude peptide on semipreparative HPLC:

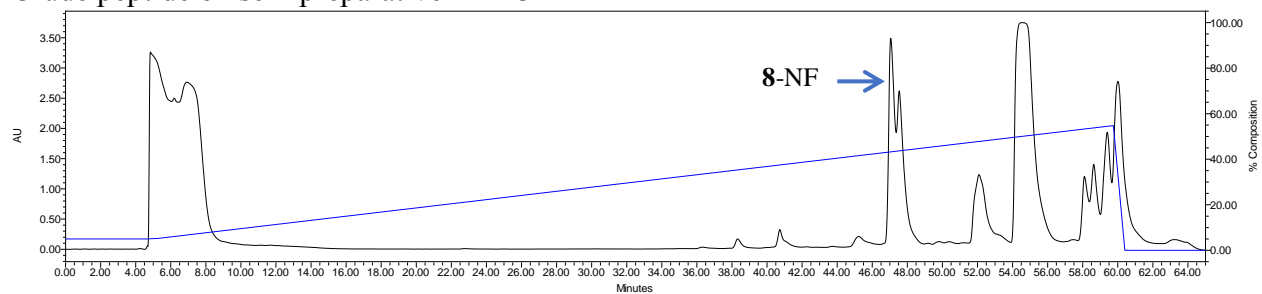

### Purity check (analytical reversed-phase HPLC):

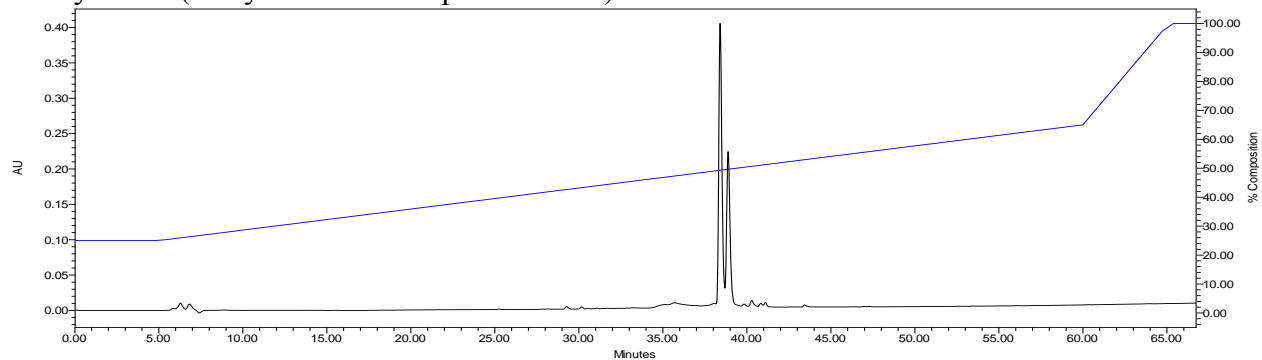

MALDI-TOF MS: Expected for  $M+H^+$ : 1840.863; Found 1840.907

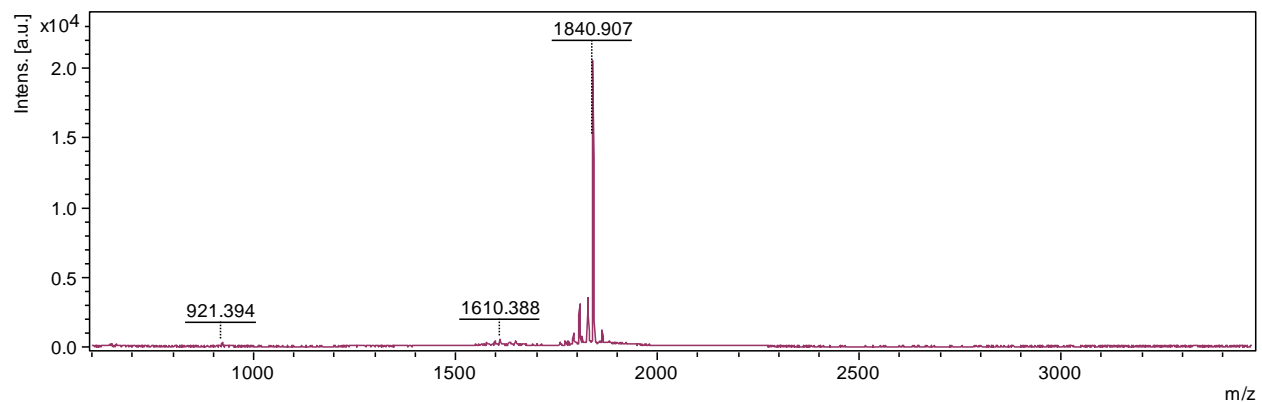





















# CPP12-NF

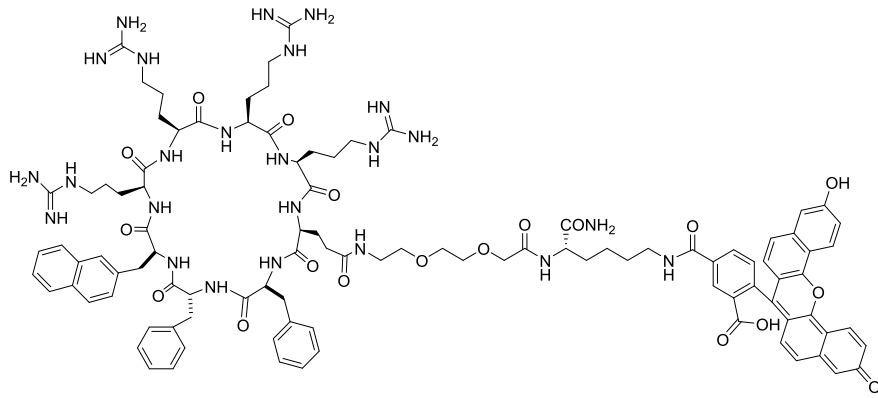

Crude peptide on semipreparative HPLC:

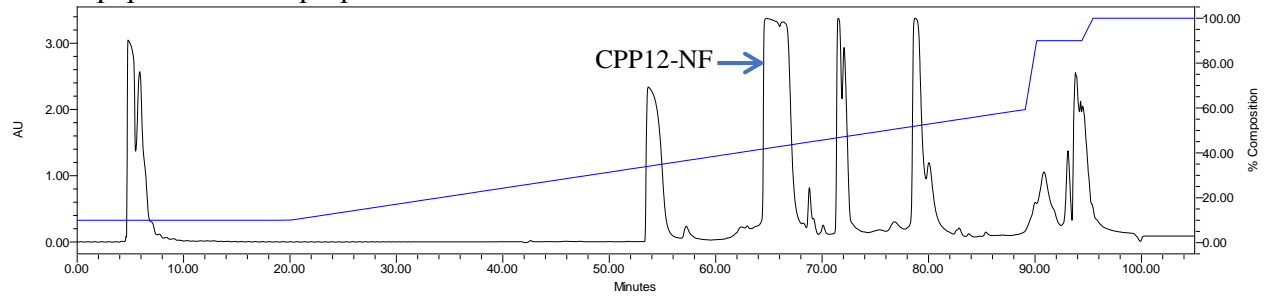

Purity check (analytical reversed-phase HPLC):

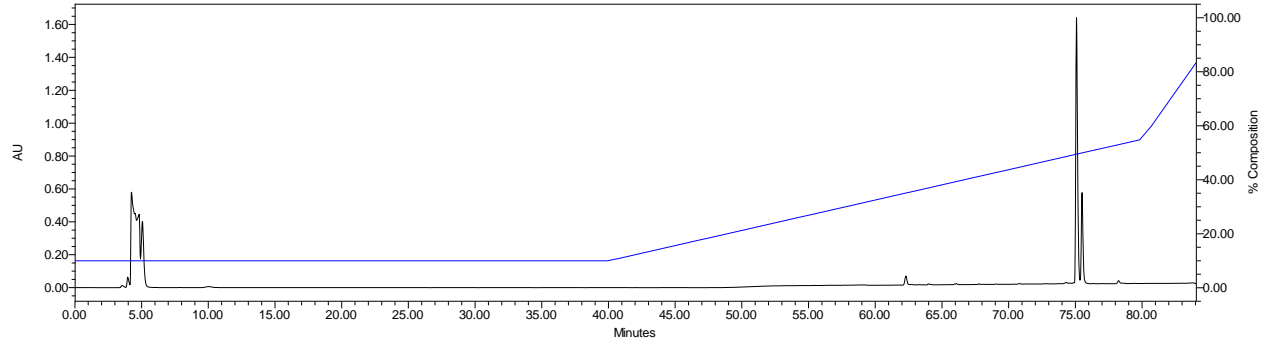

MALDI-TOF MS: Expected for  $M+H^+$ : 1975.932; Found 1975.839

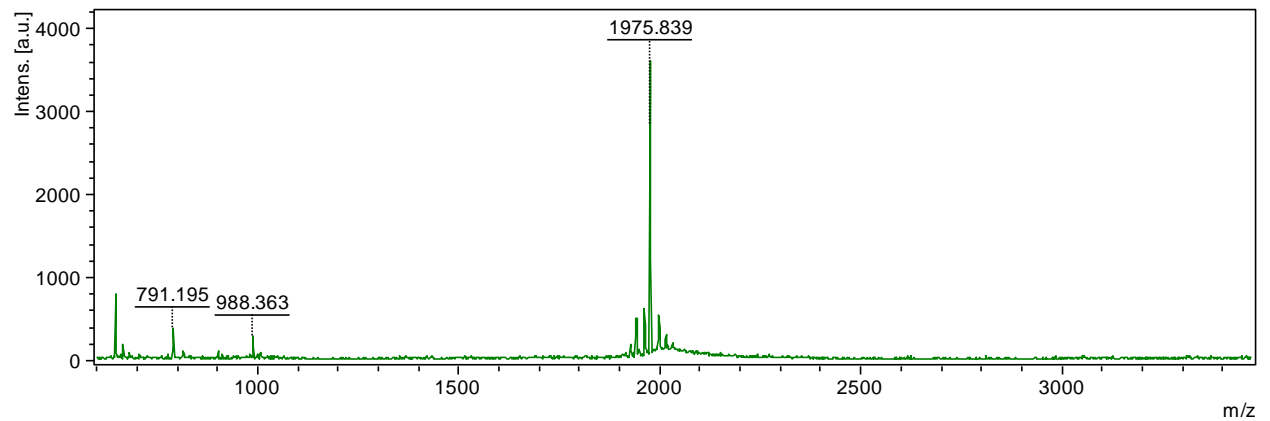







## Peptide 17-Alexa488

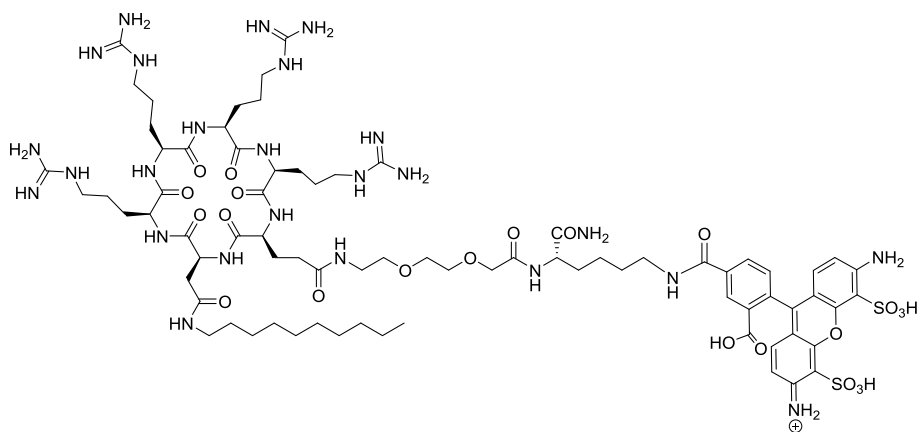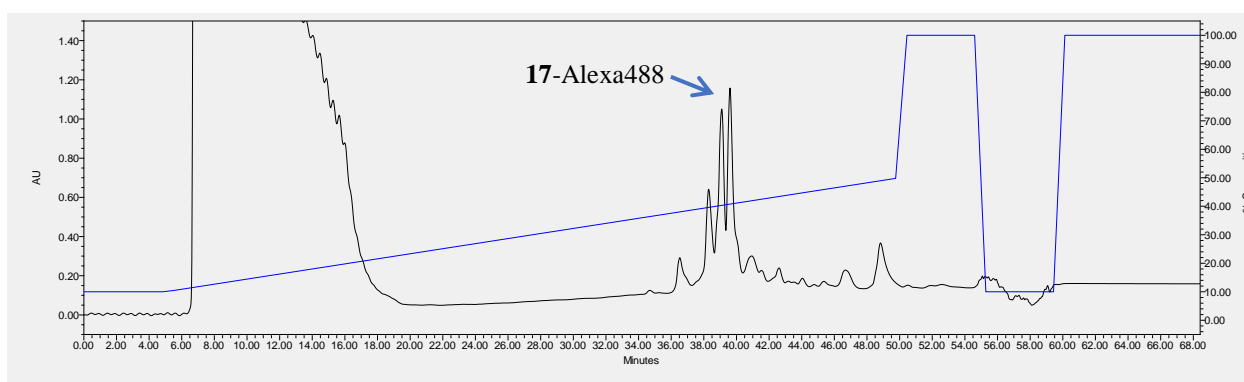

MALDI-TOF MS: Expected for  $M+H^+$ : 1796.83; Found 1796.940

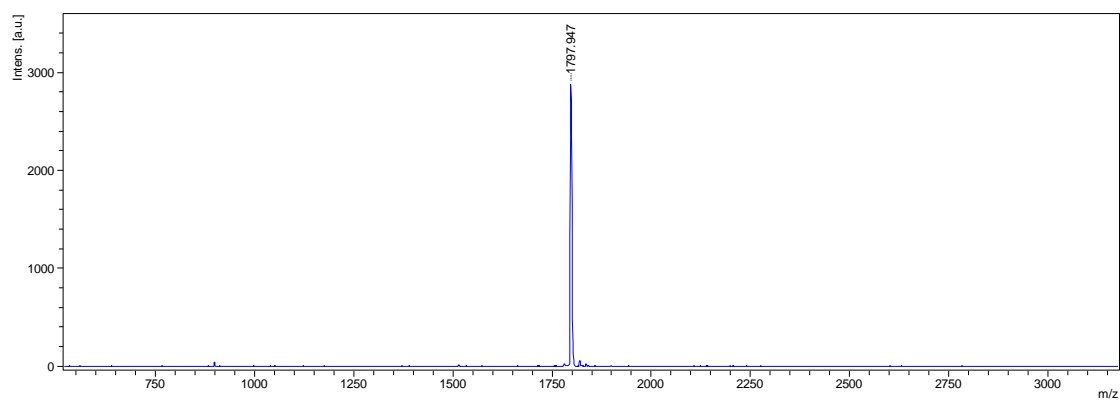

Supplement: NIHMS1050227-supplement-supp_info.pdf [file NIHMS1050227-supplement-supp_info.pdf]
